# Supplementary material
Source: Springer Nature journal article supplement (https://www.springermedizin.de/resource/supplementary/12888_2007_225_MOESM1_ESM.pdf/9482228)

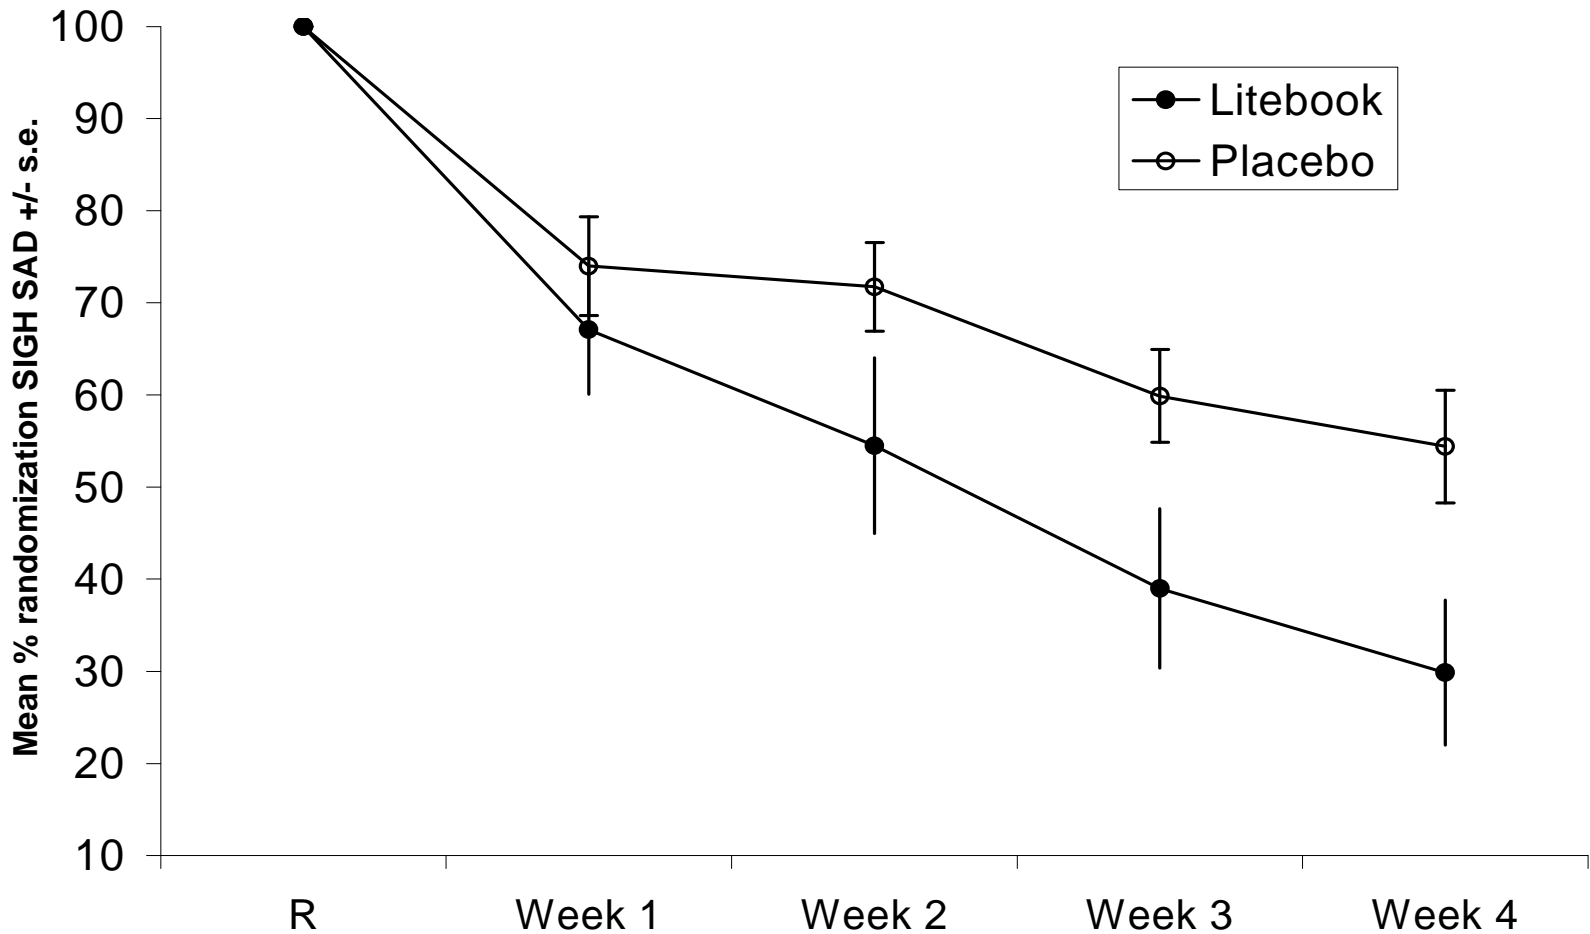

Supplement: MOESM1 [file 9482228]
